# Supplementary material for: TCR-transgenic T cells and YB-1-based oncolytic virotherapy improve survival in a preclinical Ewing sarcoma xenograft mouse model
Source: PubMed Central journal article supplement (PMC10839048; doi:10.3389/fimmu.2024.1330868), 2024-01-22
Supplement: DataSheet_1.pdf [file DataSheet_1.pdf]

Schober SJ et al. (2023):

# TCR-transgenic T cells and YB-1 based oncolytic virotherapy improve survival in a preclinical Ewing sarcoma xenograft mouse model

## Supplementary Material

### 1. Primer sequences used in this study

| Name          | Specificity | Forward 5'-3'                      | Reverse 5'-3'                     |
|---------------|-------------|------------------------------------|-----------------------------------|
| CXCL10        | human       | GTG GCA TTC AAG GAG TAC CT         | TGA TGG CCT TCG ATT CTG GA        |
| GAPDH         | human       | CTC TGC TCC TCC TGT TCG AC         | ACG ACC AAA TCC GTT GAC TC        |
| HLA-A         | human       | TCA CCC TGA GAT GGG AGC            | ATG TGG AGG AGG AAG AGC T         |
| HLA-B         | human       | CAG TTC GTG AGG TTC GAC AG         | CAG CCG TAC ATG CTC TGG A         |
| $\beta$ actin | human       | TAA GTA GGT GCA CAG TAG<br>GTC TGA | AAA GTG CAA AGA ACA CGG<br>CTA AG |

### 2. Antibodies used in this study

#### 2.1 Antibodies for hexon-titer-test (HTT)

| Specificity              | REF    | Concentration | Method | Company         |
|--------------------------|--------|---------------|--------|-----------------|
| Adenovirus (hexon)       | AB1056 | 1:1000        | HTT    | Merck Millipore |
| Rabbit anti-goat IgG-HRP | P0449  | 1:1000        | HTT    | Dako            |

#### 2.2 Antibodies for flow cytometry (conjugated) – anti-human

| Specificity   | Fluorochrome   | Clone     | Concentration | Company          |
|---------------|----------------|-----------|---------------|------------------|
| CD3           | PE-Vio770      | REA613    | 1:100         | Miltenyi Biotech |
| CD4           | APC-Vio770     | REA623    | 1:100         | Miltenyi Biotech |
| CD8           | FITC           | REA734    | 1:100         | Miltenyi Biotech |
| CD25          | APC            | REA579    | 1:100         | Miltenyi Biotech |
| CD40          | VioBright FITC | REA733    | 1:100         | Miltenyi Biotech |
| CD45          | VioGreen       | REA747    | 1:100         | Miltenyi Biotech |
| CD45          | APC            | REA747    | 1:100         | Miltenyi Biotech |
| CD47          | FITC           | REA220    | 1:100         | Miltenyi Biotech |
| CD80          | PE             | REA661    | 1:100         | Miltenyi Biotech |
| CD86          | VioBlue        | REA968    | 1:100         | Miltenyi Biotech |
| CHM1-multimer | PE             | -         | 1:100         | Busch Lab        |
| HLA-ABC       | APC            | REA230    | 1:100         | Miltenyi Biotech |
| HLA-ABC       | PerCP-Vio700   | REA230    | 1:100         | Miltenyi Biotech |
| HLA-DR        | APC            | REA804    | 1:100         | Miltenyi Biotech |
| HLA-DR        | PE-Vio770      | REA805    | 1:100         | Miltenyi Biotech |
| CD274 (PD-L1) | APC            | REA1197   | 1:100         | Miltenyi Biotech |
| CD274 (PD-L1) | VioBright B515 | REA1197   | 1:100         | Miltenyi Biotech |
| CD279 (PD-1)  | APC            | PD1.3.1.3 | 1:100         | Miltenyi Biotech |
| REA Ctrl      | APC            | REA293    | 1:100         | Miltenyi Biotech |
| REA Ctrl      | FITC           | REA293    | 1:100         | Miltenyi Biotech |
| REA Ctrl      | VioBright B515 | REA293    | 1:100         | Miltenyi Biotech |

### 2.3 Further dyes and solutions used for flow cytometry

| <b>Application</b>  | <b>Dye/Name</b>                  | <b>REF</b>  | <b>Concentration</b>  | <b>Company</b>           |
|---------------------|----------------------------------|-------------|-----------------------|--------------------------|
| Cell proliferation  | eFluor450                        | 65-0842-85  | According to protocol | Thermo Fisher Scientific |
| Dead cell exclusion | DAPI staining solution           | 130-111-570 | 1:100                 | Miltenyi Biotech         |
| Dead cell exclusion | Propidium iodide (PI = solution) | 130-093-233 | 1:100                 | Miltenyi Biotech         |
| Dead cell exclusion | Viability 405/520 Fixable Dye    | 130-109-814 | According to protocol | Miltenyi Biotech         |
